# Supplementary material
Source: Springer Nature journal article supplement (https://www.springermedizin.de/resource/supplementary/13075_2011_3470_MOESM3_ESM.pdf/9694616)

← scanner bore

← surface coil

← custom bed

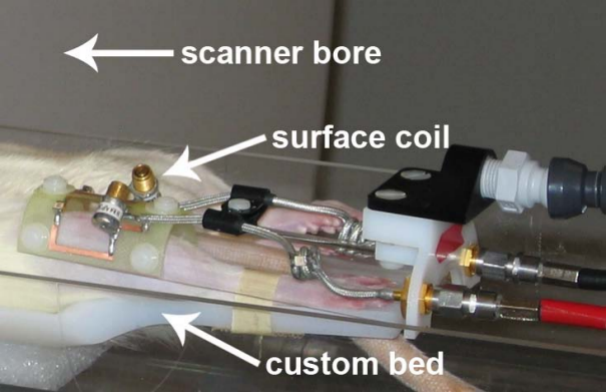

Supplement: MOESM3 [file 9694616]
